1 **Transcription amplification by nuclear speckle association**

2 **Authors:** Jiah Kim<sup>1</sup>, Nimish Khanna<sup>2</sup>, Andrew S. Belmont<sup>123\*</sup>

3 **Affiliations:**

4 <sup>1</sup>Center for Biophysics and Quantitative Biology

5 <sup>2</sup>Department of Cell and Developmental Biology

6 <sup>3</sup>Carl R. Woese Institute for Genomic Biology, University of Illinois at Urbana-Champaign,  
7 Urbana, IL 61801, USA

8 \*Correspondence to: Andrew S. Belmont, [asbel@illinois.edu](mailto:asbel@illinois.edu)

9 **Abstract:**

10 A significant fraction of active chromosome regions and genes reproducibly position near  
11 nuclear speckles, but the functional significance of this positioning is unknown. Here we show  
12 that Hsp70 BAC transgenes and endogenous genes turn on 2-4 mins after heat shock irrespective  
13 of their distance to nuclear speckles. However, we observe 12-56-fold and 3-7-fold higher  
14 transcription levels for speckle-associated Hsp70 transgenes and endogenous genes, respectively,  
15 after 1-2 hrs heat shock. Several fold higher transcription levels for several genes flanking the  
16 Hsp70 locus also correlate with speckle-association at 37 °C. Live-cell imaging reveals this  
17 modulation of Hsp70 transcription temporally correlates with speckle association/disassociation.  
18 Our results demonstrate stochastic gene expression dependent on positioning relative to a liquid-  
19 droplet nuclear compartment through a “transcriptional amplification” mechanism distinct from  
20 transcriptional bursting.

## 21 **Introduction**

22 Striking variations in transcriptional activity have been correlated with nuclear  
23 compartmentalization. Across multiple species and cell types, lamin-associated domains (LADs),  
24 as revealed by DamID, show low gene densities and transcriptional activity (Kind et al., 2013).  
25 Similarly, across multiple species and cell types, the radial positioning of gene loci within a cell  
26 population stochastically closer to the center of the nucleus is associated with higher  
27 transcriptional activity (Kolbl et al., 2012; Takizawa et al., 2008). This stochastic correlation  
28 between gene expression and radial positioning may mask a more deterministic relationship  
29 between gene expression and gene positioning relative to a specific nuclear body which itself is  
30 radially distributed. Nuclear speckles, a RNP-containing, liquid droplet-like nuclear body  
31 enriched in both RNA processing and transcription related factors (Lamond and Spector, 2003;  
32 Spector and Lamond, 2011), are a prime candidate for such a nuclear body. Nuclear speckles  
33 indeed show a radial distribution with decreased numbers near the nuclear periphery and  
34 increased concentration towards the nuclear interior. By electron microscopy they appear as  
35 interchromatin granule clusters (IGCs)- clusters of ~20 nm diameter RNPs lying between  
36 chromatin regions.

37 Nuclear speckles were suggested to act as a gene expression “hub” for a subset of genes  
38 based on the observation of ~10/20 highly active genes localizing near the nuclear speckle  
39 periphery (Brown et al., 2008; Hall et al., 2006; Shopland et al., 2003). Support for this  
40 expression hub model was significantly boosted recently by a new genomic mapping method,  
41 TSA-Seq (Chen et al., 2018), which demonstrated that chromosome regions localizing most  
42 closely with nuclear speckles correspond largely to the A1 Hi-C subcompartment, one of two  
43 major transcriptionally active chromosomal subcompartments, as mapped by Hi-C (Rao et al.,  
44 2014). These nuclear speckle-associated chromosome regions were enriched in the most highly  
45 expressed genes, house-keeping genes, and genes with low transcriptional pausing. Another new  
46 genomic mapping method, SPRITE (Quinodoz et al., 2018), also showed that a large fraction of  
47 the genome with high levels of active pol II transcription preferentially positioned near nuclear  
48 speckles.

49 This positioning of a subset of genes near nuclear speckles, however, is only a  
50 correlation. Despite this genome-wide demonstration of a subset of active genes positioning  
51 deterministically near nuclear speckles, there is no evidence that alleles of endogenous genes

52 actually show different expression levels as a function of speckle proximity. Indeed, the  
53 prevailing view has been that nuclear speckles act instead primarily as a storage site for RNA  
54 processing factors (Lamond and Spector, 2003).

55 Previously, we demonstrated an increased speckle-association of BAC transgenes  
56 containing the Hsp70 gene locus, including HSPA1A, HSPA1B, and HSPA1L after heat shock  
57 (Hu et al., 2009). This increased speckle association was also observed for large, multi-copy  
58 insertions of plasmid transgenes containing just the HSPA1A gene and shown to depend on the  
59 HSPA1 promoter and proximal promoter sequences rather than the actual transcribed sequences  
60 (Hu et al., 2010). Live-cell imaging revealed that the increased speckle association after heat  
61 shock for a large, ~700-copy HSPA1A plasmid transgene array occurred either through  
62 nucleation of a new nuclear speckle adjacent to the transgene array, or, more interestingly,  
63 through the actin-dependent, long-range directed movement of the transgene array to a  
64 preexisting nuclear speckle (Khanna et al., 2014). Strikingly, a significant increase in the MS2-  
65 tagged HSPA1A transcript occurred only after but within several minutes after first contact with  
66 a nuclear speckle (Khanna et al., 2014).

67 However, the physiological relevance of this increased transcriptional signal after speckle  
68 association of this large plasmid transgene array remained unclear with regard to the actual  
69 behavior of the endogenous Hsp70 locus. Cytologically, like other large, heterochromatic  
70 plasmid transgene arrays, this HSPA1A transgene array showed an unusually condensed  
71 chromatin mass during interphase that was preferentially positioned near the nuclear periphery.  
72 Moreover, in contrast to the synchronous induction of transcriptional activation 2-5 mins after  
73 heat shock of the endogenous Hsp70 locus, this plasmid transgene arrays showed a highly  
74 asynchronous transcriptional activation over 10-30 mins after heat shock (Hu, 2010).

75 To determine the influence of speckle proximity on transcriptional activation in a more  
76 physiological context, we investigated Hsp70 gene activation as a function of speckle association  
77 after heat shock at both the endogenous and BAC transgene loci.

78

## 79 **Results and Discussion**

80 First, we identified human haploid Hap1 and Chinese Hamster CHO cell lines in which  
81 the endogenous heat shock locus showed significant populations of both speckle-associated  
82 (~90%) and non-speckle associated (~10%) alleles ( $> 0.45 \mu\text{m}$ ) (Fig. S1A-D). In contrast, human  
83 K562, Tig3, WI-38, and HCT116 showed near 100% pre-positioning adjacent to nuclear  
84 speckles (data not shown, (Tasan et al., 2018)). We next established that integrated BAC human  
85 Hsp70 transgene in several independently derived CHO cell clones (Hu et al., 2010; Khanna et  
86 al., 2014) showed similar gene positioning relative to nuclear speckles before and after heat  
87 shock and changes in transcription with speckle association as seen for the endogenous Hsp70  
88 locus in both Hap1 and CHO cells (Fig. S1), suggesting a mechanism that targets both the  
89 endogenous Hsp70 locus and BAC Hsp70 transgenes to nuclear speckles. This Hsp70 BAC, with  
90 a deletion of the HSPA1A and HSPA1L genes, contains just the single HSPA1B gene within a  
91 172kb human genomic insert (Hu et al., 2009; Khanna et al., 2014). We focused on clone C7  
92 containing 1-3 Hsp70 BAC copies, as estimated by qPCR, integrated at a single chromosomal  
93 locus for further investigation.

94 Hsp70 BAC transgenes in CHO cells showed near identical speckle association behavior  
95 and transcriptional induction dynamics after heat shock as the endogenous Hsp70 locus in Hap1  
96 cells (Fig. 1A, Fig S1). The fraction of human haploid Hap1 nuclei containing a positive RNA  
97 FISH Hsp70 nascent transcript signal increased from near 0 to 1 between 0-4 mins after heat  
98 shock (Fig. 1A,  $n=110-210$ , each time point, each replicate). A near identical synchronous  
99 induction between 0-4 mins after heat shock was observed for the HSPA1B gene in the Hsp70  
100 BAC transgene (Fig. 1A,  $n=95-150$  each time point, each replicate).

101 We next measured the smRNA FISH signal (nascent pre-mRNA) at both BAC transgenes  
102 and endogenous loci when they were speckle-associated versus non-speckle associated. We  
103 defined BAC transgenes and endogenous genes as “speckle-associated” if the transgene and/or  
104 nascent transcripts positioned within  $0.15 \mu\text{m}$  from the nuclear speckle edge and “non-speckle  
105 associated” when the transgene and/or nascent transcripts located further than  $0.45 \mu\text{m}$  from the  
106 nuclear speckle edge. Assuming a steady-state between new transcript synthesis and release of  
107 transcripts from the transcription site, then the integrated nascent transcript signal should be  
108 proportional to the transcription rate. Indeed, the number of dispersed Hsp70 mRNAs 15 mins

109 after heat shock correlates linearly with the nascent RNA signal (Pearson correlation coefficient,  
110  $R=0.6$ , Fig. 1B-C).

111 Despite the near 100% transcriptional induction of alleles 4 mins after heat shock, the  
112 actual levels of nascent Hsp70 transcripts increased significantly when the allele was speckle-  
113 associated (“A”) versus not-associated (“N”) (Fig. 1D) ( $n(A/N)= 101/101, 91/40, 107/63$  at 0, 1,  
114 2 hrs). At 1 hr after heat shock, we observed a 14-fold higher nascent transcript level for speckle-  
115 associated versus non-associated Hsp70 BAC transgenes. This ratio increased to 57-fold by 2 hrs  
116 due an  $\sim 2$ -fold increase in nascent transcripts for speckle-associated transgenes combined with  
117 an  $\sim 2$ -fold decrease in nascent transcripts for non-associated transgenes (Fig. 1D, inset). For the  
118 endogenous Hsp70 genes in both CHO and Hap1 cells, we observed an  $\sim 3$ -fold (1 hr) to  $\sim 7$ -fold  
119 (2 hr) increased level of nascent transcripts from speckle-associated versus non-associated alleles  
120 after heat shock (Fig. 1E) (CHO:  $n(A/N)= 46/33, 50/28$  at 1 and 2 hrs; HAP1:  $n(A/N)=102/44,$   
121  $112/33$  at 1 and 2 hrs) . Both the endogenous and BAC speckle-associated Hsp70 genes showed  
122 roughly a doubling of nascent transcript levels between 1 and 2 hrs after heat shock, but only the  
123 BAC transgenes not associated with speckles showed a decrease in transcript levels between 1  
124 and 2 hrs.

125 The increased transcription of Hsp70 with speckle association raised the question of  
126 whether transcription of genes flanking the Hsp70 locus would similarly show increased levels  
127 with speckle association. We measured nascent transcripts from three active human genes-  
128 VARS, LSM2, and C6orf48- flanking the Hsp70 genes on the BAC transgene (Fig. 2A-C) stably  
129 integrated in CHO cells. By smRNA FISH, all three genes showed nearly  $\sim 100\%$  of alleles with  
130 nascent transcripts and a 2.5-3-fold increase in nascent transcript levels with speckle association  
131 (Fig. 2B-C).

132 Similarly, for the endogenous human Hsp70 locus we measured 3.0-fold increases for  
133 each of the VARS, LSM2, and C6orf48 gene nascent transcript levels and 1.7-fold for the MSH5  
134 gene nascent transcript levels in human Hap1 cells (Fig. 2D-F). In contrast to C6orf48, which  
135 showed constant transcriptional activity, MSH5, LSM2, and VARS are bursting genes that show  
136 nascent transcripts in only  $90\pm 1\%$ ,  $46\pm 2\%$ , and  $70\pm 2\%$  of these Hap1 haploid cells (mean $\pm$ SEM  
137 from 3 independent experiments). However, for each of these three bursting genes, the fraction  
138 of cells with visible nascent transcripts associated with nuclear speckles versus visible nascent  
139 transcripts not associated with nuclear speckles was comparable to the fraction of gene loci

140 mapped by DNA FISH as adjacent to nuclear speckles versus not adjacent to nuclear speckles  
141 (Fig. S1A). Thus, speckle association did not increase the frequency of bursting for these genes,  
142 but did enhance their levels of transcription.

143 To determine the temporal relationship between speckle association and transcription, we  
144 used live-cell imaging of the Hsp70 BAC transgenes which contained a 256mer lac operator  
145 repeat inserted 29.4 kb upstream of the HSPA1B gene and a 24-mer MS2 repeat inserted into the  
146 HSPA1B 3' UTR (Hu et al., 2009; Khanna et al., 2014). Lac operators were tagged with EGFP-  
147 lac repressor, nuclear speckles with EGFP-SON, and the MS2 repeats on transcripts with  
148 mCherry-MS2 binding protein (mCherry-MBP).

149 From 1080 cell movies, we obtained 438 in which the BAC transgene, nuclear speckles,  
150 and MS2-tagged transcripts could all be tracked over the entire 25 min observation period. The  
151 observed dynamics from each of these 438 cells were then sorted into different categories (Table  
152 1). The three simplest general categories corresponded to cells in which the transgene was  
153 always associated with a speckle (Fig. 3A), cells in which the transgene started distant from a  
154 speckle but then moved to and remained associated with a speckle (Fig. 3B), and cells in which  
155 the transgene became associated with a speckle and showed a visible transcription signal, but  
156 then moved away from the speckle (Fig. 4A).

157 In the first category (146/438 cells), the BAC transgene remained localized within 0.15  
158  $\mu\text{m}$  from the nuclear speckle during the entire observation period (Fig. 3A). Nascent transcripts  
159 became visible above the diffuse background of the MS2-binding protein typically between 2-4  
160 mins after the temperature reached 42°C for heat shock (Fig. 3C, grey bars), and increased  
161 gradually afterwards (Video 1). In the second category (41/438 cells), the transgene-speckle  
162 distance at some point exceeded 0.45  $\mu\text{m}$  but then the transgene became stably associated with a  
163 nuclear speckle and subsequently a MS2 signal appeared (Fig. 3B, Video 2). On average these  
164 cells showed an  $\sim 3$  min delay in the appearance of a visible MS2 signal relative to cells in the  
165 first category (Fig. 3C), due largely to the extra time required for the transgene to move to the  
166 speckle. If speckle contact occurred after the temperature had already reached 42°C, a visible  
167 MS2 signal typically appeared above background 0-2 mins after contact (Fig. 3B&D). The time  
168 lag was longer when speckle association occurred before the temperature reached 42°C (Fig.  
169 3D). Details varied among examples (Table 1); usually the transgene moved to the speckle but  
170 occasionally a speckle moved toward the activated transgene (data now shown).

171 In the third category of speckle movements (28/438 cells), the transgene associated with a  
172 nuclear speckle and produced a visible MS2 nascent transcript signal but then moved away from  
173 the speckle. Significantly, a decrease or disappearance of the MS2 signal followed this  
174 transgene-speckle separation (Fig. 4A, Video 3). Once transgenes moved further than 0.5-1  $\mu\text{m}$   
175 from a speckle, transcripts decayed within 1-2 mins. However, when transgenes moved smaller  
176 distances away from the speckle, a low level of transcription was maintained longer rather than a  
177 rapid and complete decay of the MS2 signal. When the MS2-transcript level was low, we  
178 observed loss of the transcript signal right after transgene-speckle separation, while when  
179 transcription levels were higher a complete loss of transcript signal appeared to require a larger  
180 separation. Indeed, we could sometimes observe creation of a connecting “bridge” of MS2-  
181 tagged transcripts lying between the transgene and speckle periphery. We also could observe  
182 deformation of the speckle shape toward the transcripts (Fig. 4B, Video 4). These transcript  
183 bridges sometimes elongated as the transgene moved away from the speckle until the transgene  
184 had moved far enough away to break contact. Once the transgene dissociated with speckle, the  
185 nascent transcript signal did not increase without new speckle association (Fig. 4C).

186 More complicated and/or rarer classifications shed additional light on the functional  
187 significance of nuclear speckle association to HSPA1B transcription (Table 1, Fig. S2). In 5/438  
188 cells, although the transgene did not associate with any speckles, we observed small transient  
189 increases for no longer than one time point of the MS2-tagged nascent transcript signal above the  
190 MS2-binding protein background (Fig. S3A). In all other cases, appearance of a MS2 signal  
191 above background was coupled to nuclear speckle association, which in contrast yielded  
192 substantially higher frequency and longer duration increased transcript signals. Additional  
193 dynamics include speckle protrusion to a transgene (7.5%), nucleation of a new speckle (8%),  
194 movement of the transgene from one speckle to another (6.4%). A physical connection between  
195 the BAC transgene, its nascent transcripts, and the associated nuclear speckle is demonstrated by  
196 their coordinated movements (8.5%, Fig. S3B, Video 5).

197 Interestingly, at both heat shock and normal temperatures, we observed long-range  
198 transgene movements relative to nuclear speckles (Table 1, Fig. S2). These movements included  
199 repetitive oscillations in which transgenes moved large distances away from speckles and then  
200 back to the same speckle or sometimes to a different speckle (data not shown). Based on our  
201 smRNA FISH results, we anticipate that such oscillations should produce significant variations



202 in the transcriptional levels of the four genes flanking the Hsp70 locus showed transcriptional  
203 amplification associated with speckle association as transcription levels of Hsp70 transgenes  
204 increase/decrease depending on speckle association/dissociation.

205 In summary, here we demonstrated a new phenomenon of “transcriptional amplification”  
206 for Hsp70 genes and 4 genes flanking the Hsp70 locus, whereby association with nuclear  
207 speckles is associated with a several fold boost in transcription. This transcriptional amplification  
208 phenomenon is distinct from the now well-described phenomenon of transcriptional bursting, in  
209 which genes pulse on and off, in each case for extended time periods.

210 Our results parallel our previous findings of the appearance of Hsp70 transcription after  
211 speckle association of a very large plasmid transgene array. However, this plasmid array was  
212 unusually heterochromatic and its activation dynamics after heat shock were greatly delayed and  
213 abnormal as compared to the endogenous heat-shock locus. Our current results now extend this  
214 earlier work by placing these observations in a physiological context relevant to gene regulation  
215 of endogenous gene loci. Moreover, our results now clearly establish that the increased  
216 transcription is not related to control of initiation of transcription but rather transcriptional  
217 amplification. The tight temporal correlation between speckle association/disassociation and  
218 increased/decreased transcription suggests transcriptional amplification follows contact with the  
219 nuclear speckle periphery, through direct contact between transgene and speckle and/or through  
220 the bridging of nascent transcripts. An actual physical linkage between transgene and speckle  
221 through the bridging nascent transcripts is further suggested by live cell movies showing  
222 elongation of the MS2 signal during transgene movement away from speckles (Fig. 4B, Video 4)  
223 and coordinated movements of speckle, transcript, and transgene (Fig. S3B, Video 5).

224 Overall, our results support the concept of nuclear speckles as a gene expression hub  
225 capable of increasing the level of transcription of associated genes. This transcriptional  
226 amplification function of nuclear speckles adds to previously suggested nuclear speckle  
227 functions, including modulating of post-transcriptional processing activities such as splicing and  
228 nuclear export (Galganski et al., 2017; Spector and Lamond, 2011). We propose speckle  
229 association as a new mechanism of stochastic gene expression for a potentially large subset of  
230 active genes. Future work will be aimed at determining the prevalence of transcriptional  
231 amplification mediated by nuclear speckle contact and its underlying molecular mechanism.

## 232 **Materials and Methods**

### 233 **Cell culture and establishment of cell lines**

234 CHO cells were grown in Ham's F12 media (Cell Media Facility, University of Illinois at  
235 Urbana-Champaign) with 10% fetal bovine serum (FBS) (Sigma-Aldrich, F2442) at 37°C in a  
236 5% CO<sub>2</sub> incubator. To generate stable CHO cell lines, we carried out a series of DNA  
237 transfections followed by selection of stable colonies with 4 different DNA constructs in the  
238 following order: 92G8+3'MS2+GKREP\_C26 Hsp70 BAC (G418, 400µg/ml), p3'SS-EGFP-dlacI  
239 (hygromycin, 200µg/ml) (Robinett et al., 1996), EGFP-SON-Zeo BAC (zeocin, 200µg/ml), and  
240 pUb-MS2bp-mCherry (puromycin, 400µg/ml) (Khanna et al., 2014). Modifications of the  
241 original 92G8 Hsp70 BAC (Invitrogen) to 92G8+3'MS2+GKREP\_C26 included insertion of a  
242 lac operator repeat and Kan/Neo selectable marker cassette (Hu et al., 2009), deletion of 8 kb  
243 containing the HSPA1A and HSPA1L genes (Hu et al., 2010), and insertion of MS2 repeats into  
244 the 3' UTR of HSPA1B (Khanna et al., 2014). The original SON BAC (165J2, Invitrogen) was  
245 modified by adding GFP to the NH2 terminus of the SON coding region to generate EGFP-SON-  
246 Zeo BAC (Khanna et al., 2014). The final CHO cell clone we used for live-cell imaging in these  
247 studies was C7MCP. C7MCP cells were maintained in complete media with 200 µg/ml G418,  
248 100 µg/ml hygromycin, 100 µg/ml zeocin, 200 µg/ml puromycin. When cells were seeded on  
249 coverslips or glass-bottom dishes 2 days prior to cell imaging, media was changed to complete  
250 media without any pH indicator and with no G418, hygromycin, zeocin, or puromycin added.  
251 Hsp70\_5, Hsp70\_14, Hsp70\_20 CHO stable cell clones, generated previously (Hu et al., 2009),  
252 contain the full length Hsp70 BAC, modified with the lac operator repeat and selectable marker,  
253 integrated at different insertion sites. The parental CHO DG44 cell line used for the generation of  
254 these three clones stably expressed EGFP-Lac repressor. These three clones were grown in  
255 Ham's F12 media with 10% FBS with 100µg/ml hygromycin and 200µg/ml G418.

256

### 257 **Single molecule RNA FISH (smRNA FISH) probe design**

258 smRNA FISH was performed using Stellaris probes and the Stellaris protocol (Biosearch  
259 Technologies). Probes were designed with the Stellaris Probe Designer using 1.5~2kb of the 5'

260 end of coding sequence. FISH probe sets for each gene consisted of ~33 20mer DNA  
261 oligonucleotides, complementary to the target RNA. Probe sets used were:  
262 CHO *Hsp70* (cacgcacgagtaggtggtg, ctccgtgctggaacacg, tggctgttggcgatgatct,  
263 gtcggtgaaggccacgtag, cgtcgaacacgggtgttctg, cgaacttgcggccgatcag, gatctcctcggggtagaag,  
264 catcttcgtcagcaccatg, tgatcaccgcgttgggtcac, gagtcgtgaagtaggcgg, cgtgggctcgttgatgac,  
265 ccaggtcgaagatgagcac, atggacacgtcgaacgtgc, gaagatgccgtcgtcgtc, cacgaagtggctcaccagc,  
266 tggacgacagggtcctctt, cctcgaacagggagtcgat, cgccgtgatggacgtgtaga, ggaacagggtccgagcacag,  
267 ctctgcaccttggggatg, gttgaagaagtctgcagc, gatgctcttgtgaggtcg, ctgcacgttctcagacttg,  
268 ttgatgagcggcgtcatca, gagtaggtggtgaaggtct, cgtacacctggatcagcac, gatgccgctgagctcgaag,  
269 atcgatgtcgaaggtcacc, tgacgttcaggatgccgtt, taggactcgagcgcgttct, gcgctcttcatgttgaagg,  
270 aggagatgacctctgaca, cacgaactcctccttctg, ctaatccacctcctcgtg, acaccgggagagcaagcag,  
271 agggctaactaacctgac), *Hsp70* (gggagtcactctcgaagac, cacaggttcgctctggaaag,  
272 aacgccgaaactcaacacg, cgacaagagctcagtcctt, tgagactgggggctggaaac, tggctgttggcgatgatctc,  
273 ttcgctcaaacacgggtgtt, ttgtctccgtcgttgatcac, agatctcctcggggtagaat, atctcctcatcttggtcag,  
274 ctgagagtcgtgaagtagg, atgatccgcagcacgttgag, tcaggatggacacgtcgaag, tcgaagatgccgtcgtcgtg,  
275 ccctcaaacagggagtcgat, ggtgatggacgtgtagaagt, , ttcggaacaggctcggagcac, aggaccaggctcgtgaatctg,  
276 ttgaagaagtctcgcagcag, ttgatgctcttgttcaggtc, tgcacgttctcggacttctc, ttgatcagggcagtcacac,  
277 tcgtacacctggatcagcac, cagattgtgtcttctctca, atgtcgaaggtcacctcgtg, tgacgttcaggatgccgttg,  
278 tcatgttgaaggcgtaggac, tgtccagaaccttcttctt, cagagatgacctcttgaca, ttgtgctcaaactcgtcctt,  
279 ctgatgatggggttacacac, actaaagaacaaaggccct, aagtccttgagtccaacag, ccatcaggttacaactaac), *MSH5*  
280 (ccacgagcctgcaaaagga, cgctacagggtgggagaacg, cgcctttcagtaacctga, tcacgcgttatcttctc,  
281 gagtcgtgcacgtcttatg, gaaggaaggggtctgaggg, tcattctgtcacgcggag, attgtgggaaactccacgc,  
282 ggtgaattctcgggtattt, tggagagctgtggacacag, tacttctgctacagggtc, tggcgcgcagaatgcaaaag,  
283 acgattcacagaggaggcc, aaaagtgagggcggttcgg, catgagcttggaggctctg, cttgggttcgctcctaag,

284 ctggggaagccggaggag, ttctactcccctcagagac, ccatcaactctccattcaa, ccaaccctcttttattcta,  
285 gatctgtccagcaaggaag, attccacagcacacacaga, taggcaatgcccaagtatc, gtggagtcactagtatcat,  
286 gcatctggcatgaagtgga, gagaagcttgaggctctcg, ggaattcatggttccatcc, catctgcaatcccagagag), *VAR5*  
287 (acaccctgagcagcagc, cgcggagcagcagcagc, ccggtctcagcagcagc, ctttgtgacagcagcagc,  
288 tagttccctaagatcgcc, agtcgagcgggcagagac, aatccacctcagcagcag, agatggtcagactgggcc,  
289 cgcgtgtactactggag, tcggcgtctggttgatg, ggagtgtggaaggctctc, aactatccaccatcgccg,  
290 ggggagttcctggggaag, ttcagaggggcagtgct, ctgtcaggagccgaggac, ctgagggtctgaccaggc,  
291 agacacccgagtcccata, ctcacgggagctccttcg, ggtcctatgtttgagtag, gaagactcggggatcgag,  
292 aggtccgaacgaagtgga, gggagacgtagagggtgg, ctggggaaggcatctggg, tagcgagcggctatgagg,  
293 gtggctggagacagatgc, gttggacaaggacagccg, cgtgtcggcgttaactgac, cacaggcagctggtatta,  
294 cgagcttcggagtcccag), *LSM* (gagcgaagctgggtagag, caagcgtgacgggcaaag, gcgggaagcagcagaaaa,  
295 caggctcgggaaaccgaa, ggaagacagcagggtgctg, cttttgacgtcacggtacc, ggtacaaaggccagatccc,  
296 ctctcaatgaacctgaga, atatcccattgttctcag, tttttccctcatcatgga, tcctcactgaatctctctc,  
297 aggtctaactttccgtct, aagcttgctggcagagaa, agaaaatatcccaccgca, cccactccttcaatgaat,  
298 ctgtgctctcagtcgac, aagtcacagagagactctg, aaggctggagcccaatta, catccctgacagttctcaa,  
299 tactggattgtgaacccc, ggagtgtcctttgacagta, tgtgggaaggagcatgta, gggagagagggggaaaacc,  
300 tagttccacgaccacatcc, gtacctacctcaggtcatt, cccaacagacttgttgaa, tgctttgtattgtttcca,  
301 aaagaggtccagggcc, gtacatctccacctcgc, aggcacaaggcatttatt, actgcgcctgacctgtatt),  
302 *C6orf48*(gagcccacttcgcaaaaag, aactctcatactgccaacc, cactcaacagtcgggcat, tgcgcaaaggcagcgaag,  
303 caacggtagttcaccaac, agacaccagaaactccagt, gagctaggtcagttccaag, ttgtttgagtcagcaggg,  
304 ccattttgcaatcactcgc, atcatcactcccttctat, cactcaagagttacctggg, tcagagcgtcgggtgatg,  
305 aaatgctggaccgagggggg, ccatgaactcgttgagcct, ttacaactcctaacgggga, ggataacacggcgatgaac,  
306 cctaatactcactttact, aggcattcaaaaggctctc, ttgggaacaaagctttccg, atgcccataaacgaaagct,

307 actcctatTTTgcagtaga, ggacgtagaaaaggagga, agggaagctcttctggaaa, ccaattagggagatctgga,  
308 agcatcggagactctagtc, gttcctaataatgagtcaga, cttctggagaccaagtat, tgggcttccagagttcatt,  
309 ctctgtgaagggtgcattgt, ccttcactcagattagtc, gagggggagattccaaacc, gccatacaaagcttctctc)

310

### 311 **Single molecule RNA FISH (smRNA FISH) procedure**

312 Each oligonucleotide contained an amino group at the 3' end for fluorophore coupling  
313 using either Cy5 NHS ester (GE Healthcare, PA15102) or rhodamine NHS ester (ThermoFisher,  
314 46406). NHS esters and probes were incubated overnight in 0.1M sodium bicarbonate solution  
315 (pH 8.0) at room temperature, and purified using Bio-Spin P6 columns (Bio-Rad, 7326221)  
316 according to the manufacturer's protocol. Purified, pooled probe concentrations were ~50-100  
317  $\mu$ M in Tris buffer, pH 7.4.

318 Cells were seeded on coverslips (Fisher) 2 days before experiments. For heat shock, a  
319 well-plate or dish containing the coverslip and media was sealed using parafilm and incubated in  
320 a 42°C-water bath. Cells were fixed using freshly prepared 3.6% paraformaldehyde (PFA,  
321 Sigma, P6148-500G) in phosphate-buffered saline (PBS) for 15 mins at room temperature (RT).  
322 After washing 5 mins 3x in PBS, cells were permeabilized using 0.5 % Triton X-100  
323 (ThermoFisher, 28314) for 10 mins in DEPC-treated PBS. For DEPC treatment, 1 ml fresh  
324 DEPC was added to 1 L PBS or water, incubated more than 15 hrs at RT, and autoclaved for 25  
325 min to inactivate the remaining DEPC. After rinsing 3x in DEPC-treated PBS, the permeabilized  
326 cells were equilibrated in wash buffer (10% Formamide (Sigma, F9037), 2x saline-sodium citrate  
327 (SSC)) for 30 mins. The cells were incubated in hybridization buffer with smRNA FISH probes  
328 (final concentration, ~300-500nM) for 15 hrs at 37 °C. The hybridization buffer contained 2x  
329 SSC, 10% formamide, 10% w/v dextran sulfate (Sigma, D8906), 1 mg/ml E.coli tRNA (Sigma,  
330 R8759), 2 mM ribonucleoside vanadyl complex (RVC) (NEB, S1402), 0.02% RNase-free BSA  
331 (Ambion, AM2618) in DEPC-treated water. The cells were then washed 30 mins 2x at 37 °C in  
332 wash buffer, and mounted in a Mowiol-DABCO anti-fade medium (Ed Harlow, 1988).

333 smRNA FISH in HAP1 cells was followed by immunostaining against SON. After  
334 smRNA FISH, cells were fixed again with 3.6% PFA in DEPC-treated PBS for 15 mins, and  
335 washed for 5 mins 3x. Cells were incubated in blocking buffer (0.5% Triton X-100, 1% w/v

336 RNase-free BSA, 20  $\mu$ M RVC). Cells were incubated with primary antibody against SON  
337 (Sigma, HPA 023535) at a 1:300 dilution in DEPC-treated PBS for 1 hr in a humid chamber at  
338 RT, washed for 5 mins 3x in DEPC-treated PBS, and incubated with Alexa488-labeled, goat  
339 anti-rabbit IgG secondary antibody (Invitrogen, A11008) at a 1:300 dilution in DEPC-treated  
340 PBS for 1 hr in a humid chamber at RT. All antibody solutions were supplemented with 0.4U/ $\mu$ l  
341 RNase inhibitors (Lucigen, E0126). For smRNA FISH against endogenous transcripts in wild-  
342 type CHO cells, immunostaining against SC-35 was done prior to smRNA FISH. We followed a  
343 similar immunostaining procedure as described above, but with primary antibody against SC35  
344 (1:300 in PBS, Abcam, ab11826) for 12 hrs at 4°C and with Alexa488-labeled, secondary goat  
345 anti-mouse IgG antibody (Invitrogen, A11029) at a 1:300 dilution in DEPC-treated PBS. After  
346 washing 5 mins 3x in DEPC-treated PBS, slides were mounted in a Mowiol-DABCO anti-fade  
347 medium.

#### 348 **Microscopy and data analysis of fixed samples**

349 For fixed cells, we used a Personal Delta Vision microscope (GE Healthcare) equipped  
350 with a Coolsnap HQ camera and Plan Apo N 60x/1.42 NA oil-immersion objective (Olympus).  
351 Sections were spaced every 200 nm in z. Pixel size was 67 nm. 3D z-stacks were processed using  
352 the “Enhanced” version of the iterative, nonlinear deconvolution algorithm provided by the  
353 Softworx software (GE Healthcare) (Agard et al., 1989), and projected in the x-y plane using a  
354 maximum intensity algorithm. The distance between a gene and a nuclear speckle was measured  
355 from the maximum intensity projection of the 3D data set: the edge of the speckle was defined as  
356 where the nuclear speckle intensity fell to 40% of its intensity maximum, and the distance  
357 measured to the center of the BAC transgene or the edge of a FISH signal. Measurements were  
358 made manually using the line profile function in ImageJ. smRNA FISH signal intensities over  
359 nascent transcripts were measured by manually selecting the nascent RNA FISH area in 2D  
360 summed projections of the 3D raw data set, summing the pixel intensities, and then subtracting  
361 the background intensity estimated from a same size area adjacent to the nascent transcript  
362 signal. Measurements were made using ImageJ. For counting the number of mature mRNA  
363 spots, we used the StarSearch software program, as described elsewhere (Levesque et al., 2013;  
364 Shaffer et al., 2013).

## 365 **Live cell imaging and analysis**

366 Cells were plated on 35mm dishes with a #1 1/2 thickness glass coverslip bottom  
367 (MatTek, P35G-1.5-14-C) 48 hrs before imaging. For rapid, wide-field live-cell imaging, we  
368 used a GE OMX V4 microscope (GE Healthcare) equipped with a U Plan S-Apo 100×/1.40 NA  
369 oil-immersion objective (Olympus), two Evolve EMCCD cameras (Photometrics), a live cell  
370 incubator chamber (GE Healthcare) with separate temperature controllers for the objective lens  
371 and the incubator heater, and a humidified CO<sub>2</sub> supply. MatTek dishes were placed on the  
372 microscope and temperatures for both the objective lens and incubator chamber were maintained  
373 at 37 °C for ~1-3 hrs prior to data acquisition. Temperatures were set to 44 °C on both  
374 temperature controllers immediately after the 1st time frame was taken, with ramping from 37 °C  
375 to 44 °C requiring ~4 mins. Empirically, this temperature setting of 44°C for the controllers  
376 produced a media temperature of 42°C inside the Matek dish and a similar transcriptional  
377 induction of the Hsp70 BAC transgene MS2 signal on the microscope as seen off the microscope  
378 with a 42 °C heat shock.

379 3D images (z-spacing=200nm) were acquired once every min, typically using the solid-  
380 state illumination with 1% transmittance, 10-15 msec exposure for each z-slice for 477±16 nm  
381 excitation (GFP) and 2~5% transmittance, 10-20 msec exposure for each z-slice for 572±10 nm  
382 excitation (mCherry). Typically, 3D stacks from each of 20-25 fields of view were taken during  
383 each 1 min time point interval using the point-visiting function of the Softworx image acquisition  
384 software, with each 3D data stack acquired over ~ 1 sec or less. 3D z-stacks were processed  
385 using the “Enhanced” version of the iterative, nonlinear deconvolution algorithm provided by the  
386 Softworx software (Agard et al., 1989) (GE Healthcare), and projected into the x-y plane using a  
387 maximum intensity algorithm. Using a custom Matlab program, each cell in the projected live  
388 cell movies (512x512 pixel area per frame) was tracked and cropped into a 256x256 pixel area  
389 per frame with the cell translated to the center of the area and saved as a single file. If necessary,  
390 a rigid body registration (ImageJ plugin ‘StackReg’) was applied to correct for any x-y nuclear  
391 rotation and/or translational displacement between sequential time points. Each of these  
392 individual cell movie files was then visually inspected and sorted into different categories of  
393 dynamics for further analysis.

394

395 **Software:** Custom MATLAB scripts written for data analysis described in are publicly available  
396 in Github: DOI:10.5281/zenodo.2559675, URL: <https://doi.org/10.5281/zenodo.2559675>

397

### 398 **Online Supplemental Material**

399 Fig. S1 provides information about Positioning of Hsp70 BAC transgene or endogenous Hsp70  
400 gene relative to a nuclear speckle before (37 °C) or after heat shock (HS). Fig. S2 provides  
401 details about more complicated classifications of relative movements between BAC transgene  
402 and nuclear speckle. Fig. S3 shows extra examples of interesting speckle and transgene  
403 dynamics. Video 1 is the source of Fig. 3A showing stable speckle association and increase in  
404 transcription after heat shock. Video 2 is the source of Fig. 3B showing speckle association after  
405 heat shock and delayed increase in transcription. Video 3 is the source of Fig. 4A showing  
406 dissociation of transgene from speckle and decrease in transcription. Video 4 is the source of Fig.  
407 4B showing dissociation of transgene from speckle with bridging transcripts between transgene  
408 and speckle. Video 5 is the source of Fig. S3 showing coordinate movement of transgene and  
409 speckle via physical attachment.

410

411



412 **Acknowledgements**

413 Funding: ASB acknowledges support from National Institutes of Health R01 grant GM58460  
414 and from its Common Fund 4D Nucleome Program (U54 DK107965).

415 Author contributions: J.K. and A.S.B conceived of and designed the study; J.K performed  
416 experiments and analyzed data; J.K and A.S.B wrote manuscript; N.K provided a stable cell line.

417 Competing interests: The authors declare that they have no competing interests.

418 Data and materials availability: Data and materials will be provided upon request to the  
419 corresponding author; some reagents may be subject to Material Transfer Agreements.

420

421

## 422 References

- 423 Agard, D.A., Y. Hiraoka, P. Shaw, and J.W. Sedat. 1989. Fluorescence Microscopy in 3 Dimensions. *Method Cell*  
424 *Biol.* 30:353-377.
- 425 Brown, J.M., J. Green, R.P. das Neves, H.A. Wallace, A.J. Smith, J. Hughes, N. Gray, S. Taylor, W.G. Wood, D.R.  
426 Higgs, F.J. Iborra, and V.J. Buckle. 2008. Association between active genes occurs at nuclear speckles and  
427 is modulated by chromatin environment. *J Cell Biol.* 182:1083-1097.
- 428 Chen, Y., Y. Zhang, Y. Wang, L. Zhang, E.K. Brinkman, S.A. Adam, R. Goldman, B. van Steensel, J. Ma, and A.S.  
429 Belmont. 2018. Mapping 3D genome organization relative to nuclear compartments using TSA-Seq as a  
430 cytological ruler. *J Cell Biol.*
- 431 Ed Harlow, D.L. 1988. Antibodies. A laboratory manual. Cold Spring Harbor Laboratory, New York.
- 432 Galganski, L., M.O. Urbanek, and W.J. Krzyzosiak. 2017. Nuclear speckles: molecular organization, biological  
433 function and role in disease. *Nucleic Acids Research.* 45:10350-10368.
- 434 Hall, L.L., K.P. Smith, M. Byron, and J.B. Lawrence. 2006. Molecular anatomy of a speckle. *Anat. Rec. Part A.*  
435 288A:664-675.
- 436 Hu, Y. 2010. Changes in large-scale chromatin structure and dynamics of BAC transgenes during transcriptional  
437 activation. University of Illinois,, Urbana, IL. 1 pdf file.
- 438 Hu, Y., I. Kireev, M. Plutz, N. Ashourian, and A.S. Belmont. 2009. Large-scale chromatin structure of inducible  
439 genes: transcription on a condensed, linear template. *Journal of Cell Biology.* 185:87-100.
- 440 Hu, Y., M. Plutz, and A.S. Belmont. 2010. Hsp70 gene association with nuclear speckles is Hsp70 promoter  
441 specific. *J Cell Biol.* 191:711-719.
- 442 Khanna, N., Y. Hu, and A.S. Belmont. 2014. HSP70 transgene directed motion to nuclear speckles facilitates heat  
443 shock activation. *Curr Biol.* 24:1138-1144.
- 444 Kind, J., L. Pagie, H. Ortabozkoyun, S. Boyle, S.S. de Vries, H. Janssen, M. Amendola, L.D. Nolen, W.A.  
445 Bickmore, and B. van Steensel. 2013. Single-cell dynamics of genome-nuclear lamina interactions. *Cell.*  
446 153:178-192.
- 447 Kolbl, A.C., D. Weigl, M. Mulaw, T. Thormeyer, S.K. Bohlander, T. Cremer, and S. Dietzel. 2012. The radial  
448 nuclear positioning of genes correlates with features of megabase-sized chromatin domains. *Chromosome*  
449 *Res.* 20:735-752.
- 450 Lamond, A.I., and D.L. Spector. 2003. Nuclear speckles: a model for nuclear organelles. *Nature Reviews Molecular*  
451 *cell biology.* 4:605-612.
- 452 Levesque, M.J., P. Ginart, Y.C. Wei, and A. Raj. 2013. Visualizing SNSNVs to quantify allele-specific expression  
453 in single cells. *Nature Methods.* 10:865-+.
- 454 Quinodoz, S.A., N. Ollikainen, B. Tabak, A. Palla, J.M. Schmidt, E. Detmar, M.M. Lai, A.A. Shishkin, P. Bhat, Y.  
455 Takei, V. Trinh, E. Aznauryan, P. Russell, C. Cheng, M. Jovanovic, A. Chow, L. Cai, P. McDonel, M.  
456 Garber, and M. Guttman. 2018. Higher-Order Inter-chromosomal Hubs Shape 3D Genome Organization in  
457 the Nucleus. *Cell.*
- 458 Rao, S.S.P., M.H. Huntley, N.C. Durand, E.K. Stamenova, I.D. Bochkov, J.T. Robinson, A.L. Sanborn, I. Machol,  
459 A.D. Omer, E.S. Lander, and E.L. Aiden. 2014. A 3D Map of the Human Genome at Kilobase Resolution  
460 Reveals Principles of Chromatin Looping. *Cell.* 159:1665-1680.
- 461 Robinett, C.C., A. Straight, G. Li, C. Willhelm, G. Sudlow, A. Murray, and A.S. Belmont. 1996. In vivo localization  
462 of DNA sequences and visualization of large-scale chromatin organization using lac operator/repressor  
463 recognition. *Journal of Cell Biology.* 135:1685-1700.
- 464 Shaffer, S.M., M.T. Wu, M.J. Levesque, and A. Raj. 2013. Turbo FISH: A Method for Rapid Single Molecule RNA  
465 FISH. *Plos One.* 8.
- 466 Shopland, L.S., C.V. Johnson, M. Byron, J. McNeil, and J.B. Lawrence. 2003. Clustering of multiple specific genes  
467 and gene-rich R-bands around SC-35 domains: evidence for local euchromatic neighborhoods. *J Cell Biol.*  
468 162:981-990.
- 469 Spector, D.L., and A.I. Lamond. 2011. Nuclear Speckles. *Csh Perspect Biol.* 3.
- 470 Takizawa, T., K.J. Meaburn, and T. Misteli. 2008. The meaning of gene positioning. *Cell.* 135:9-13.
- 471 Tasan, I., G. Sustackova, L. Zhang, J. Kim, M. Sivaguru, M. Hamedirad, Y. Wang, J. Genova, J. Ma, A.S. Belmont,  
472 and H. Zhao. 2018. CRISPR/Cas9-mediated knock-in of an optimized TetO repeat for live cell imaging of  
473 endogenous loci. *Nucleic Acids Research.* 46:e100-e100.

474

475

476 **Main figures:**  
477

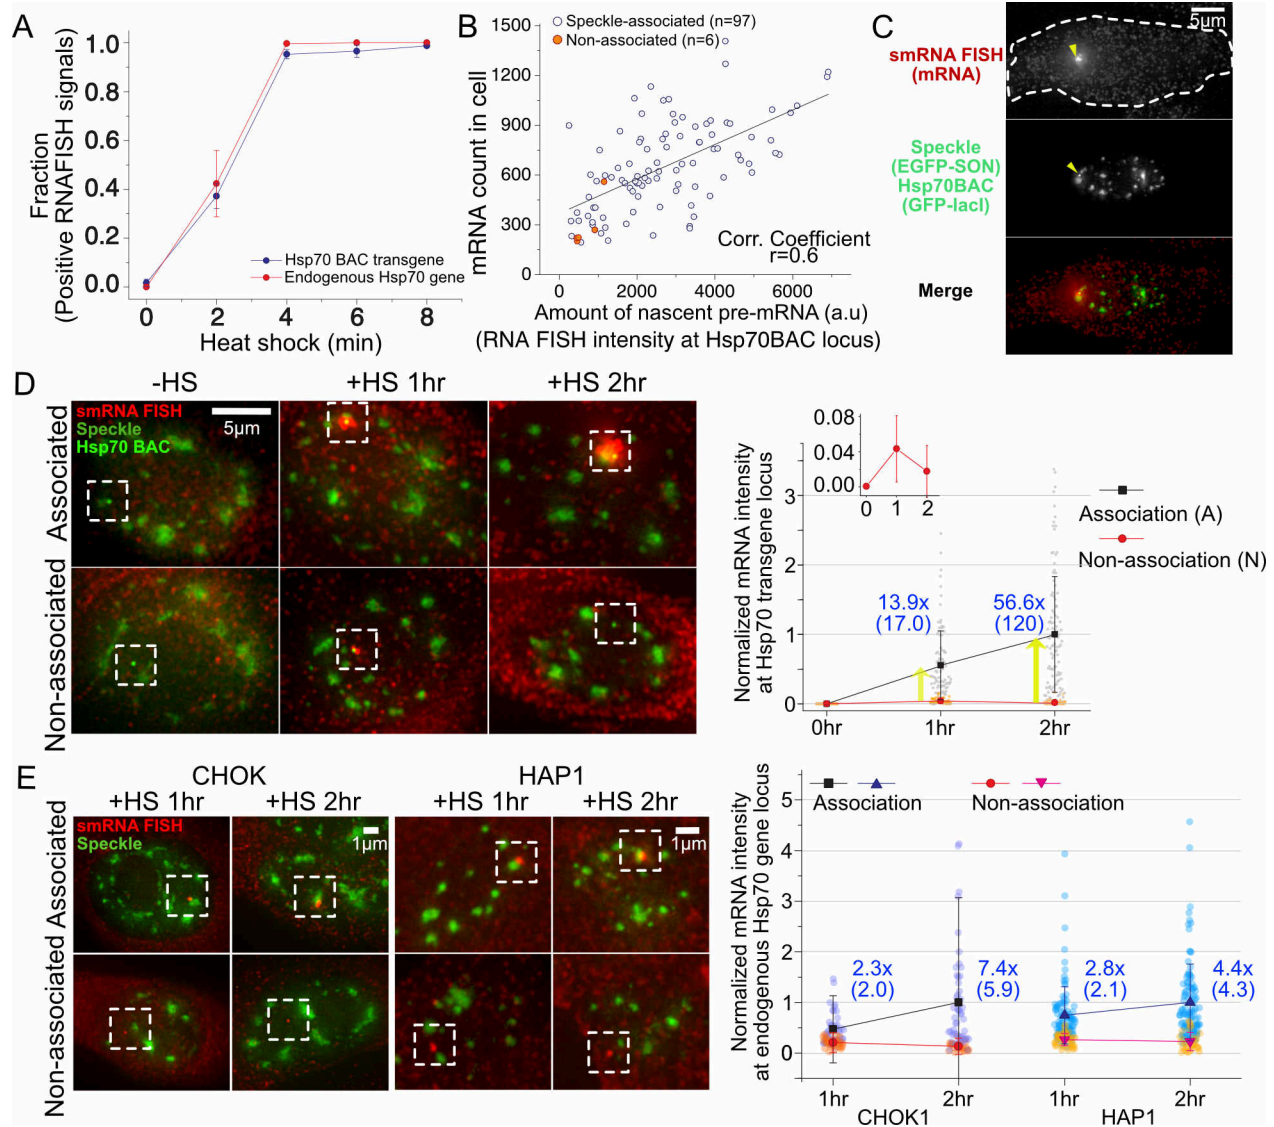

478 **Figure 1. Both Hsp70 BAC transgenes and endogenous genes induce synchronously 2-4**  
479 **mins after heat shock but show higher transcript levels when associated with nuclear**  
480 **speckles.**  
481

482 **(A)** Transcriptional induction of HSP70 BAC transgene in CHO cells and endogenous Hsp70  
483 genes in HAP1 cells occurs within 2-4 mins after heat shock (SEM, 3 replicates).

484 **(B)** Scatterplot between levels of nascent pre-mRNA signals versus numbers of mature mRNAs  
485 after 15-min heat shock.

486 **(C)** smRNA FISH image after 15 min heat shock. Nascent pre-mRNAs (arrowhead, top) at  
487 Hsp70 BAC transgene (arrowhead, middle). White dashes outline cell border.

488 **(D)** Higher pre-mRNA levels (boxed regions) for speckle-associated (top) versus non-associated  
489 (bottom) BAC transgenes: (Left) Representative images of smRNA FISH versus nuclear  
490 speckles and BAC transgene at 0, 1, and 2 hrs after heat shock; (right) mean normalized pre-  
491 mRNA intensities at speckle-associated (black, A) or non-associated (red, N) BAC transgenes 0,  
492 1, and 2 hrs after heat shock, with fold differences (blue) of mean (median) for A versus N.

493 **(E)** Left: Same as in (D) but for endogenous Hsp70 locus in CHO cells (left 2 panels) versus  
494 haploid human Hap1 cells (right two panels). Right: Same as in (D), right, for endogenous Hsp70  
495 locus in CHO (left) versus Hap1 cells (right).

496

497

498

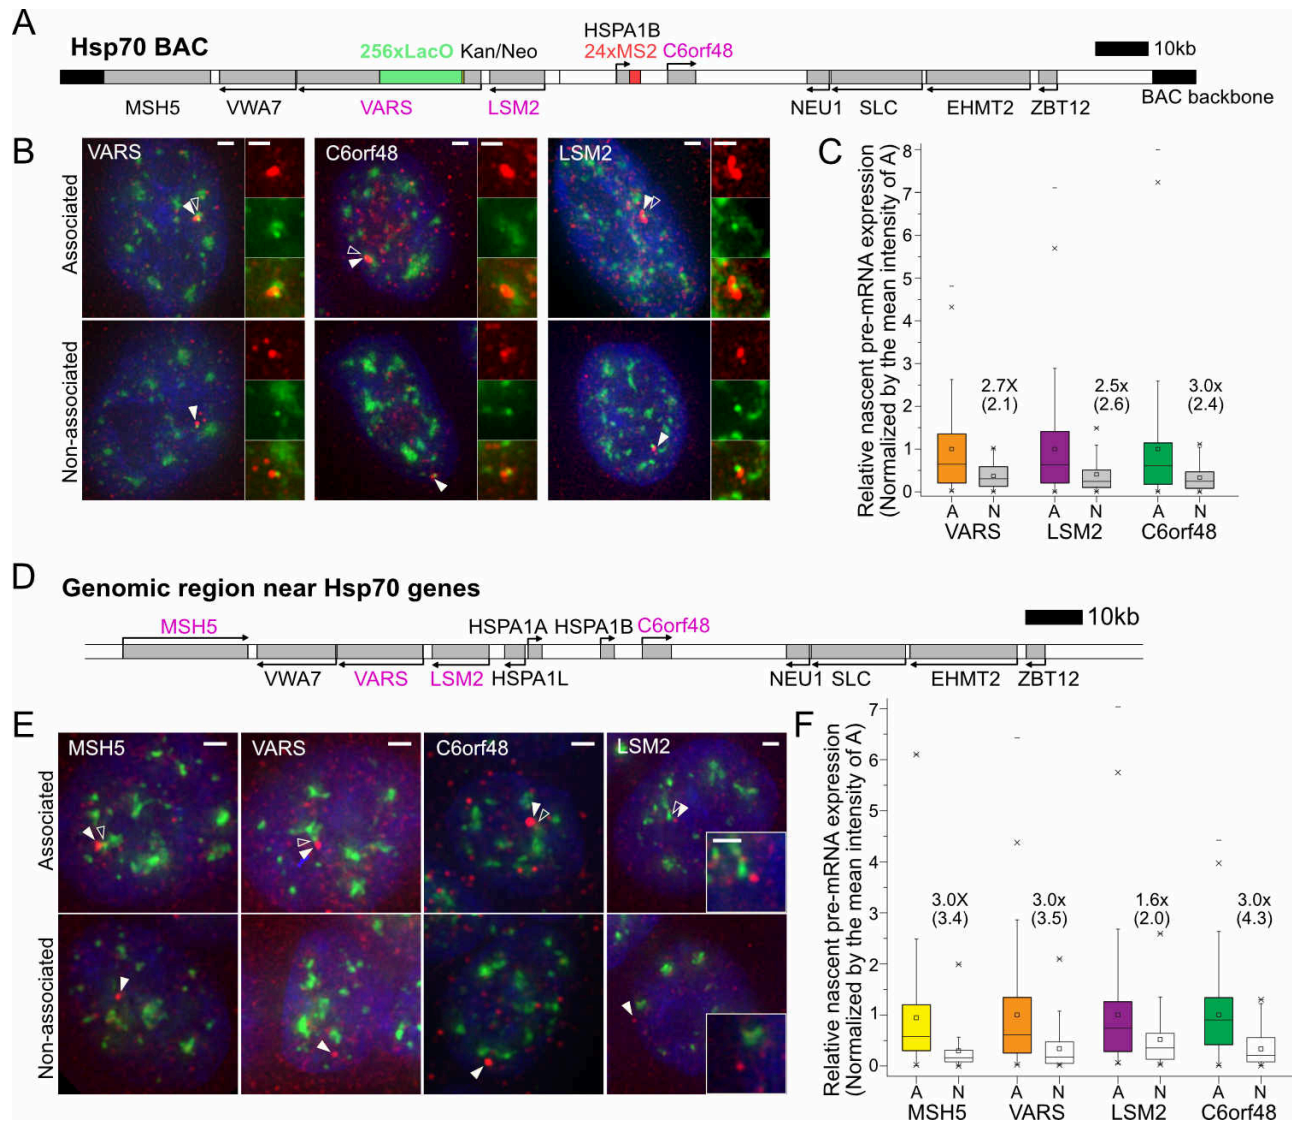

499

500 **Figure 2. Transcription amplification of speckle-associated genes flanking Hsp70 gene**

501 **locus at 37 °C.**

502 **(A and D)** Probed gene locations (grey boxes, magenta gene names) relative to Hsp70 genes in  
 503 BAC construct (A) in CHO cells and at endogenous locus (D) in human HAP1 cells.

504 **(B and E)** Representative images of smRNA FISH (red) signals for specific BAC transgene (B)  
 505 or endogenous gene (E) showing nascent transcripts associated (top) versus non-associated  
 506 (bottom) with nuclear speckles. White arrowheads- nascent transcripts; Empty arrowheads  
 507 nuclear speckle. Scale bars, 1  $\mu$ m.

508 **(C and F)** Boxplots showing nascent transcript levels for 3 (C) or 4 (F) genes flanking BAC  
509 Hsp70 transgene (C) or endogenous Hsp70 locus (F) as function of speckle association (“A”) or  
510 non-association (“N”). Intensities are normalized by the mean intensity at speckle-associated  
511 loci: fold differences (x) of the mean (median) between “A” vs. “N” (black). (C) n(A/N)=112/44,  
512 143/37, 185/39 for VARS, LSM2 and C6orf48 BAC transgenes; (D) n(A/N)=168/64, 144/47,  
513 123/52, 203/86 for endogenous MSH5, VARS, LSM2 and C6orf48 genes.  
514



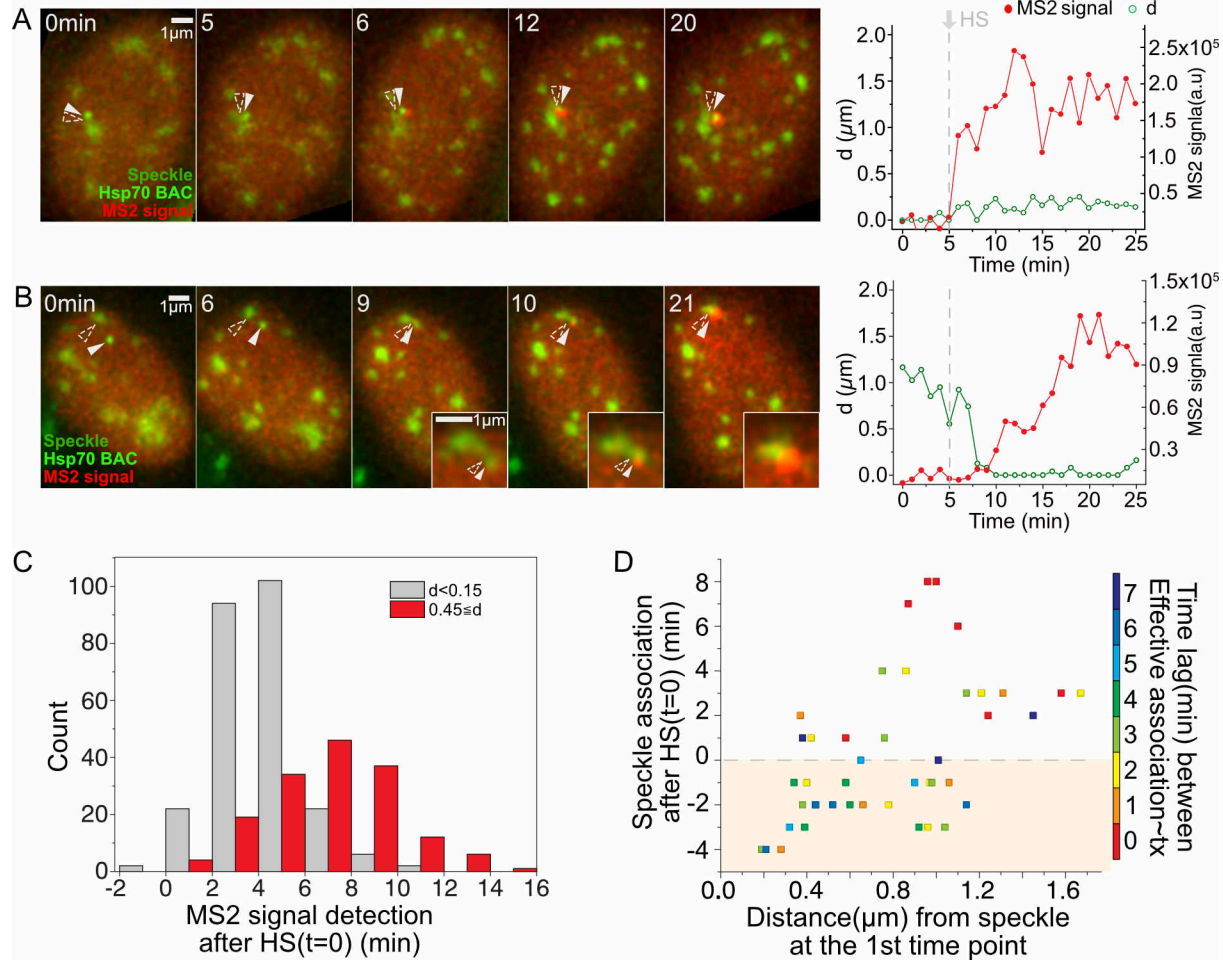

515

516

517

518 **Figure 3. Strict temporal correlation between speckle association and HSPA1B**

519 **transcriptional amplification.** (A & B) (Left panels) Transgene location (solid arrowheads),

520 nuclear speckles (open arrowheads), and MS2 signal versus time (min) after start of observation

521 (Heating on at 1 min, stable heat shock temperature (HS-T) reached at 5 min). (Right panels)

522 Distance (d) of Hsp70 transgene/nascent transcript from closest speckle (green), and nascent pre-

523 mRNA level (red).

524 **(A)** Transgene associated with speckle throughout HS. MS2 signal appears 1 min after reaching

525 HS-T at 5 mins (Video 1).

526 **(B)** Transgene initially unassociated with speckle. MS2 signal appears at 10mins, ~5 mins after  
527 reaching HS-T and ~1 min after moving to and contacting speckle (Video 2).

528 **(C)** Histogram showing time of MS2 signal appearance after reaching HS-T for transgenes  
529 initially speckle-associated (grey) versus not speckle-associated (red). MS2 signal delayed ~3-  
530 mins when not associated (mean=6.5min) versus associated (mean=3.6min).

531 **(D)** Scatterplot showing timing of speckle-transgene association after reaching HS-T versus  
532 initial transgene distance to speckle versus time lag (color) between speckle-gene association and  
533 appearance of MS2 signal. Time lags: mean= 3.8 mins, typically 0-3mins after reaching HS-T.

534



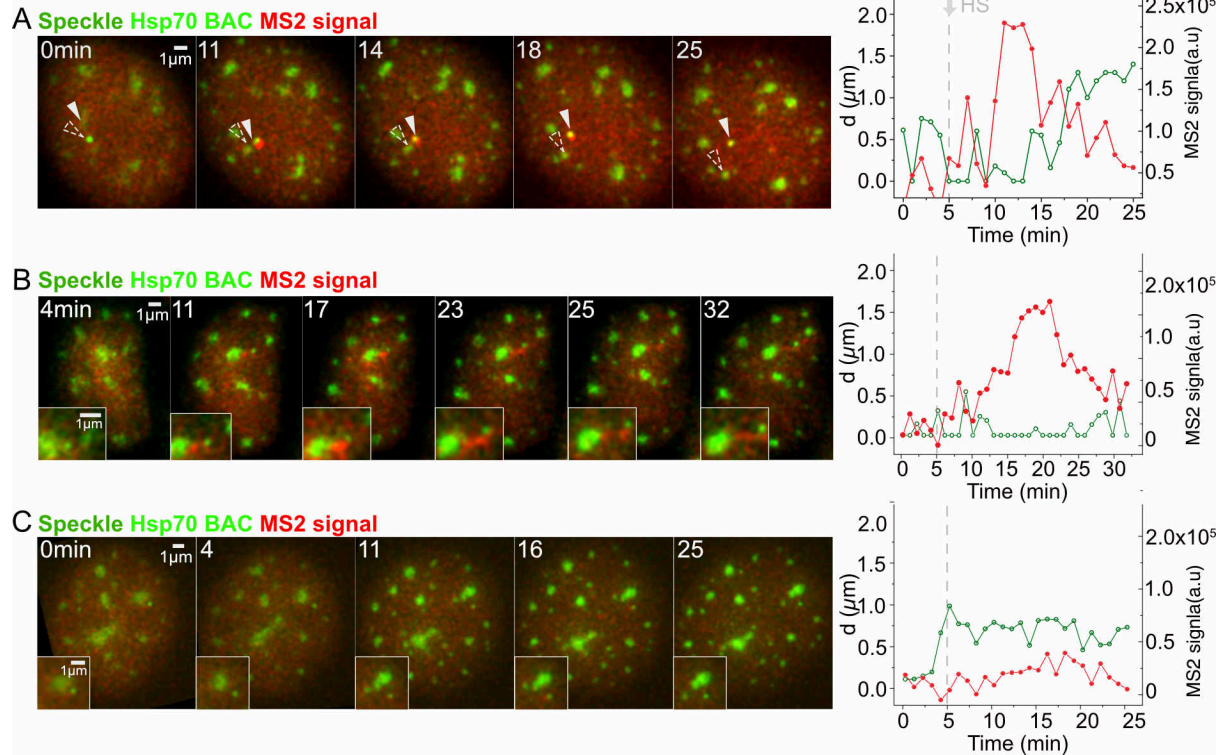

535

536 **Figure 4. Temporal correlation between speckle dissociation and decrease in HSPA1B**

537 **transcription.** Display and labeling same as in Fig. 3A and B.

538 **(A)** Hsp70 transgene disassociating from speckle. Nascent transcripts decrease and then  
539 disappear after transgene separates from speckle (Video 3).

540 **(B)** Hsp70 transgene disassociating from speckle. Nascent transcripts accumulate in elongated  
541 connection between speckle and transgene after their separation (Video 4).

542 **(C)** No speckle association of Hsp70 transgene after HS. MS2 signal transiently rises slightly  
543 above background but only for single time points (e.g. 16 min).

544

545

546

547

548

549 **Table 1. Categories of dynamics observed for 25mins without or with heat shock.**

| Categories                                                                | 37°C       | Heat shock                          |
|---------------------------------------------------------------------------|------------|-------------------------------------|
| Dynamic range of Hsp70 gene/speckle movement for association/dissociation |            |                                     |
| $d_{\max} < 0.15 \mu\text{m}$                                             | 52.7%(79)  | 33.3%(146), Fig3A, Video 1          |
| $0.15 \mu\text{m} \leq d_{\max} < 0.45 \mu\text{m}$                       | 6.67%(10)  | 11.0%(48)                           |
| $0.45 \mu\text{m} \leq d_{\max}$                                          | 16.0%(24), | 24.2%(106), Fig3B, 4A&B, Video 2-4, |
| Additional dynamics                                                       |            |                                     |
| Speckle protrusion                                                        | 5.33%(8)   | 7.53%(33)                           |
| Speckle formation                                                         | 0.00%(0)   | 7.99%(35)                           |
| No association                                                            | 0.00%(0)   | 1.14%(5), Fig. S3A                  |
| Gene moving to a different speckle                                        | 6.00%(9)   | 6.39%(28)                           |
| Coordinate movement of speckle&gene                                       | 6.67%(10)  | 8.45%(37), Fig. 4C, Video 5         |
| Mitosis                                                                   | 6.67%(10)  | 0.00%(0)                            |
| Total number of cells                                                     | 150        | 438                                 |
| Faint signal of MCP or BAC or speckles, out of focus                      | 73         | 642                                 |

550

551

552

553

554

555

556

557

558

559

560

561

562 **Videos:** Time (min) and scale bar (1  $\mu\text{m}$ ) are stamped on each video. Videos represent  
563 maximum intensity 2D projection of 3D image stack for each time point. Each image of 3D stack  
564 was captured every min. Videos play at 20fps. Video 1- 5: Temperature increase begins at 1 min,  
565 reaching 42°C at ~5 mins.

566

567 **Video 1.** Appearance of MS2-tagged nascent transcripts (red) without delay after heat shock for  
568 BAC transgene (green.) stably associated with nuclear speckle (lighter green) (see also Fig. 3A).

569 **Video 2.** Appearance of MS2-tagged nascent transcripts (red) is delayed after heat shock, with  
570 MS2 signal appearing after non-associated transgene (green) moves to and makes contact with  
571 nuclear speckle (lighter green) (see also Fig. 3B).

572 **Video 3.** Decrease and disappearance of MS2-tagged nascent transcripts (red) after  
573 disassociation of transgene (green) from nuclear speckle (lighter green) (see also Fig. 4A).

574 **Video 4.** Delayed decay of MS2-tagged nascent transcripts (red) after transgene (green)  
575 disassociation from nuclear speckle (lighter green). This delay is associated with a nascent  
576 transcript accumulation between transgene and speckle that elongates and appears to physically  
577 connect the nuclear speckle with the transgene even after the transgene moves away from the  
578 speckle (see also Fig. 4B).

579 **Video 5.** Coordinated movement of transgene (green) and nuclear speckle (light green)  
580 suggesting stable physical attachment of transgene with speckle during heat shock (see Fig. S7).

581

582

583

584

585

586

587

588

589

590

591

592

593 **Supplementary figures:**

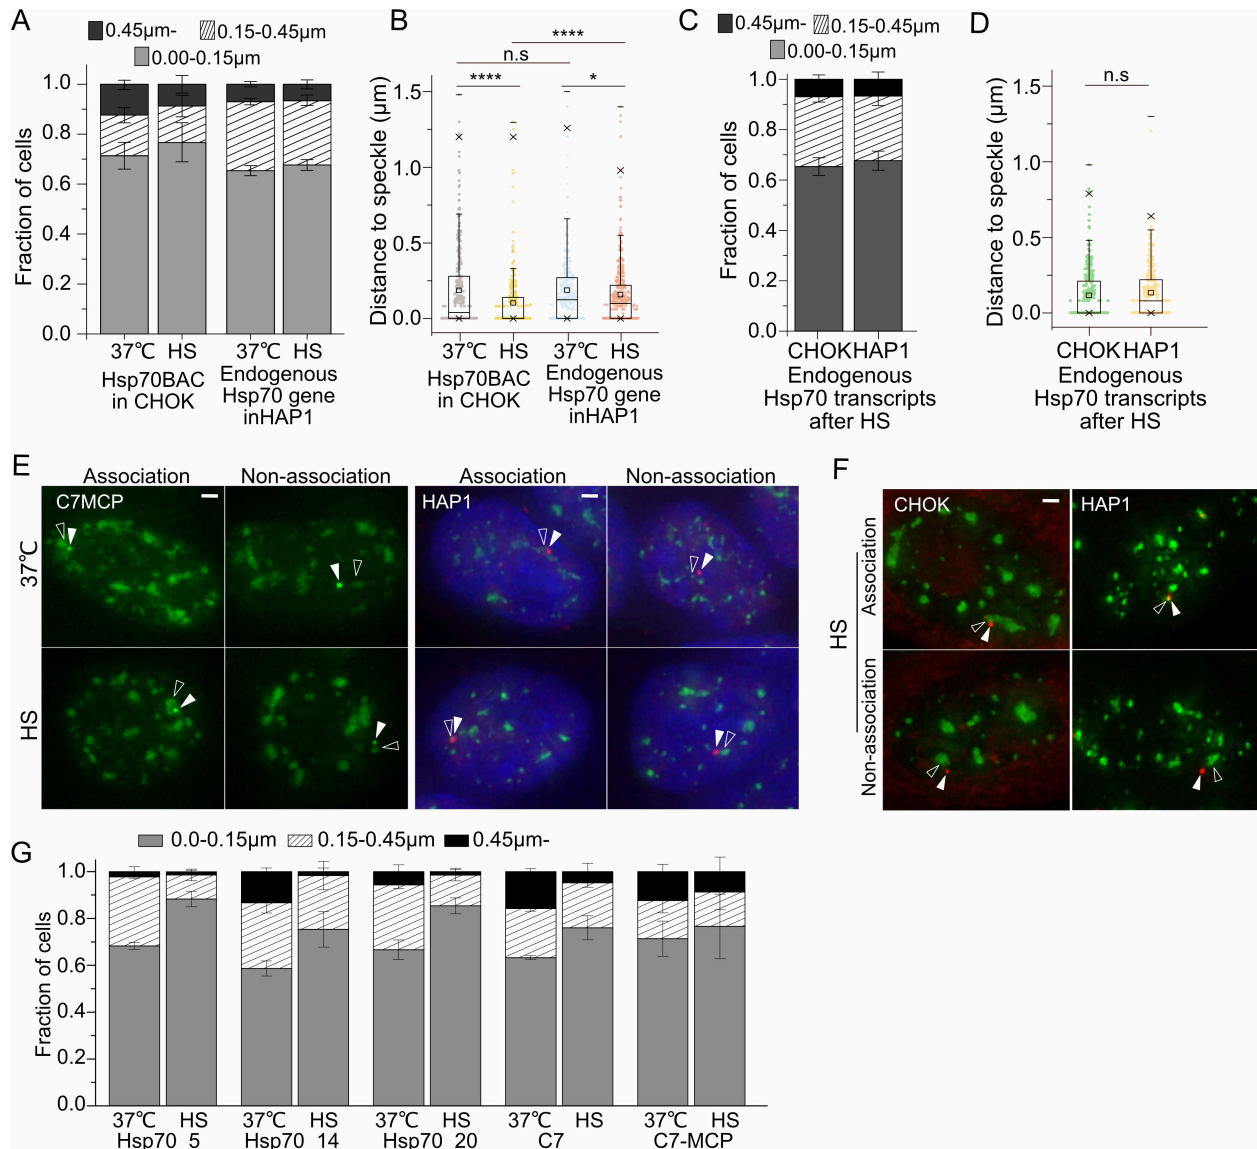

594

595

596 **Figure S1. Positioning of Hsp70 BAC transgene or endogenous Hsp70 gene relative to a**  
 597 **nuclear speckle before (37 °C) or after heat shock (HS).**

598 **(A)** Histograms showing fraction of BAC Hsp70 transgenes (lacO) in CHO cell clone C7MCP or  
 599 endogenous Hsp70 alleles in HAP1 cells (DNA FISH) at varying distances from the nuclear  
 600 speckle before and after 30 min HS (mean±SEM, 3 biological replicates, N= 100-170 per  
 601 replicate). **(B)** Boxplots showing distribution of varying distances from speckle shown in  
 602 histogram (A). Mean (square inside box), median (line), 25 (bottom) and 75 (top) percentiles;

603 ends of error bars- 10 (bottom) and 90 (top) percentiles. \* $p < 0.05$ , \*\*\*\* $p < 0.00001$ , n.s: not  
604 significant. Paired Wilcoxon signed rank test was used. **(C)** Histograms showing fractions of  
605 RNA FISH signals from the endogenous Hsp70 locus in CHO or HAP1 cells at varying distances  
606 from nuclear speckles after 30 min HS (mean $\pm$ SEM, 3 biological replicates, N= 100-120 per  
607 replicate). **(D)** Boxplots showing distribution of varying distances from speckle shown in  
608 histogram (C). Box format is same as (B). **(E)** Position of BAC transgene (green, white  
609 arrowhead) and nuclear speckle (green, empty arrowhead) (Left panels) or endogenous gene  
610 DNA FISH signal (red, white arrowhead) and nuclear speckle (green, empty arrowhead) (Right  
611 panels, DAPI staining blue) at 37 °C (top) or after HS (bottom). Scale bars= 1  $\mu$ m. (F) Position  
612 of RNA FISH of endogenous Hsp70 locus transcripts (red, white arrowheads) and nuclear  
613 speckle (green, empty arrowheads) after 30 min HS in CHO cells (left) or HAP1 cells (right).  
614 Scale bars= 1  $\mu$ m. **(F)** Positioning of Hsp70 BAC transgenes relative to nearest nuclear speckle  
615 before and after 30min HS in several independently derived CHOK cell clones. Fraction of BAC  
616 transgenes at different distances relative to nuclear speckle (mean  $\pm$  SEM, 3 biological replicates,  
617 N= 90-150 per replicate).

618  
619  
620  
621  
622  
623  
624  
625  
626  
627  
628  
629  
630  
631  
632  
633  
634  
635  
636  
637  
638  
639  
640  
641

642  
643  
644  
645

| 0.45 $\mu\text{m} < d_{\text{max}}$                        |        |           |                            |
|------------------------------------------------------------|--------|-----------|----------------------------|
| Sub-categories                                             |        | 37°C      | Heat shock                 |
| $d_1 > 0.45 \mu\text{m}$                                   | (1)F   | 41.7%(10) | 30.2%(32), Fig3B, Video 2  |
|                                                            | (2)F&B | 8.3%(2)   | 5.7%(6), Fig.4A, Video 3   |
| $d_1 < 0.15 \mu\text{m}$ , but<br>$d_n > 0.45 \mu\text{m}$ | (3)B   | 8.3%(2)   | 26.4%(28), Fig.4B, Video 4 |
|                                                            | (4)B&F | 8.3%(2)   | 8.5%(9)                    |
| FB+ $\alpha$ or BF+ $\alpha$                               |        | 33.3%(8)  | 29.2%(31)                  |
| Total                                                      |        | 100%(24)  | 100%(106)                  |

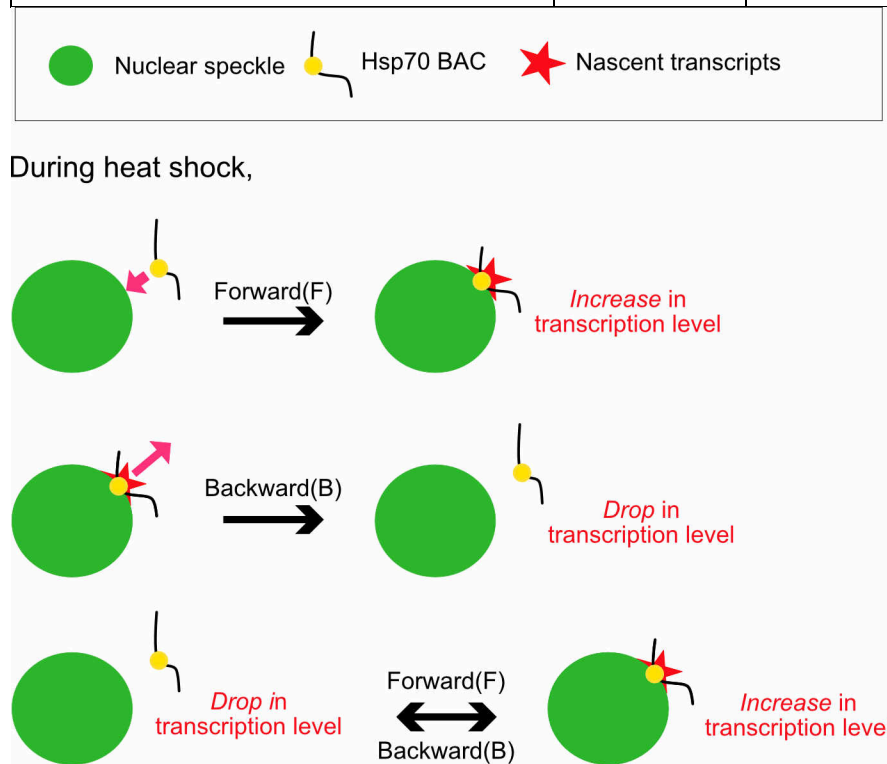

646  
647  
648  
649  
650  
651  
652  
653  
654  
655  
656  
657

**Figure S2. Statistics for more complicated classifications of relative movements between BAC transgene and nuclear speckle.**

$d_{\text{max}}$ : Maximum distance between transgene locus and speckle observed during imaging.

$d_1$ : Distance between transgene locus and speckle at the 1<sup>st</sup> time point of imaging.

$d_n$ : Distance between transgene locus and speckle at any time point during imaging.

F: Forward motion to the transgene or speckle toward another.

B: Backward motion of the transgene or speckle relative to another.

+ $\alpha$ : Additional movements.



658

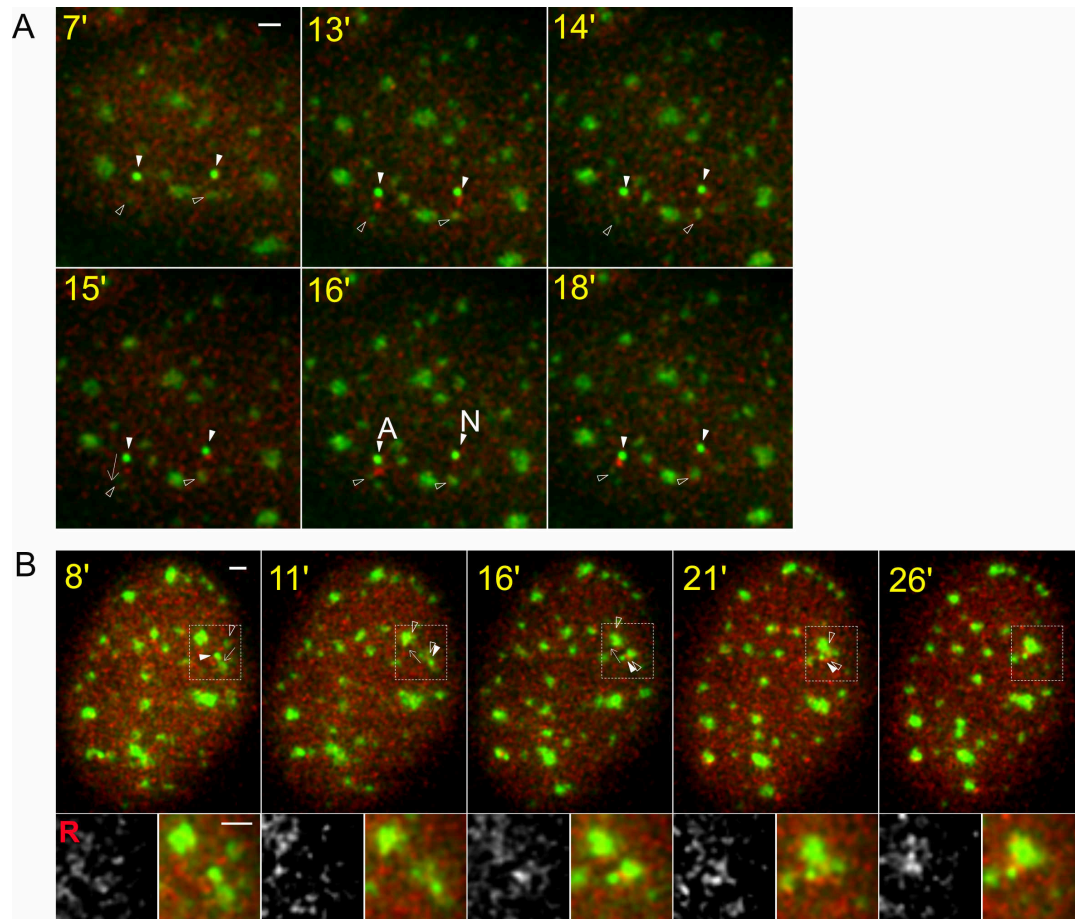

659  
660

661 **Figure S3. Extra examples of interesting speckle and transgene dynamics.**  
662 Time stamp during HS (yellow), BAC transgene (white arrowheads, bright green), nuclear  
663 speckle (empty arrowheads, lighter green), RNA MS2-tagged transcripts (red, mCherry-MS2  
664 binding protein). Scale bars, 1 $\mu$ m. **(A)** No persisting transcription for non-associating locus.  
665 Category: No association, Table 1. Arrow (15 min) shows direction of transgene movement.  
666 Transcriptional bursting is observed at both non-associating transgene loci at 13 mins. These  
667 bursting signals are observed again at 15 min at both loci. At 16 mins, one transgene (left)  
668 associates (“A”) with a speckle and now maintains elevated transcript signal during the rest of  
669 observation time, whereas the other transgene which is not associated (“N”) with speckle does  
670 not maintain an elevated transcript signal. **(B)** Coordinated movement of speckle and gene.  
671 Nuclear speckle and associated BAC transgene move together as a single unit before merging  
672 with a different speckle, suggesting a stable attachment of transgene and speckle (Video 5).  
673 Category: coordinate movement of speckle & gene, Table 1.

674

675
